# Supplementary material for: A GeneTrek analysis of the maize genome
Source: HighWire-hosted journal article supplement (doi:10.1073/pnas.0704258104), 2007-07-05
Supplement: 04258Table9.pdf [file 04258Table9.pdf]

| BAC                      | Marker              | Marker origin   | Dist. to RJM<br>marker (cM) | Chrom. | Bin  | Physical position         |                                 |                                     | Type of region                                                                                            |
|--------------------------|---------------------|-----------------|-----------------------------|--------|------|---------------------------|---------------------------------|-------------------------------------|-----------------------------------------------------------------------------------------------------------|
|                          |                     |                 |                             |        |      | IBM2 map<br>position (cM) | From S chrom. tip<br>( $\mu$ m) | Chrom. fraction<br>from cent. (cMC) |                                                                                                           |
| <i>Knob 1S</i>           | <i>umc157a(chn)</i> | <i>MaizeGDB</i> | <i>n.a.</i>                 | 1S     | 1.02 | 114.4                     | 3                               | 86                                  |                                                                                                           |
| AC147789                 | umc1076             | FPC             | n.a.                        | 1S     | 1.05 | 440.0                     | 10.6                            | 51                                  |                                                                                                           |
| AC147789                 | umc1972             | IBM mapping     | 15.4                        | 1S     | 1.06 | 503.3                     | 14.8                            | 31                                  | Not pericentromere, not periknob                                                                          |
| AC147789                 | asg58               | IBM mapping     | 43.1                        | 1S     | 1.06 | 525.7                     | 16.2                            | 25                                  |                                                                                                           |
| Centromere               | Cent1               | MaizeGDB        | n.a.                        | 1      | 1.06 | 566.3                     | 21.6                            | 0                                   |                                                                                                           |
| AC148172                 | umc2054             | FPC             | n.a.                        | 4S     | 4.05 | 291.5                     | 13.6                            | 1                                   | Pericentromere                                                                                            |
| Centromere               | Cent4               | MaizeGDB        | n.a.                        | 4      | 4.05 | 295.2                     | 13.8                            | 0                                   |                                                                                                           |
| AC148161                 | umc1935             | FPC             | n.a.                        | 5S     | 5.03 | 267.7                     | 7.8                             | 54                                  | Not pericentromere, not periknob                                                                          |
| Centromere               | Cent5               | MaizeGDB        | n.a.                        | 5      | 5.04 | 330.8                     | 17.0                            | 0                                   |                                                                                                           |
| AC148159                 | umc126a             | FPC             | n.a.                        | 5L     | 5.06 | 469.9                     | 31.3                            | 76                                  | Not pericentromere, close to knob 5L                                                                      |
| Knob 5L                  | klp5                | MaizeGDB        | n.a.                        | 5L     | 5.07 | 555.5                     | 33.3                            | 87                                  |                                                                                                           |
| Centromere               | Cent6               | MaizeGDB        | n.a.                        | 6      | 6.01 | 71.1                      | 8.1                             | 0                                   |                                                                                                           |
| AC147809                 | bnlg1867            | IBM mapping     | 4.9                         | 6L     | 6.01 | 78.3                      | 10.3                            | 10                                  |                                                                                                           |
| AC147809                 | umc2313             | FPC             | n.a.                        | 6L     | 6.01 | 91.9                      | 11.9                            | 18                                  |                                                                                                           |
| <i>Knob 6L1</i>          | <i>y1</i>           | <i>MaizeGDB</i> | <i>n.a.</i>                 | 6L     | 6.01 | 120.5                     | 13.9                            | 27                                  |                                                                                                           |
| AC147809                 | umc1006             | IBM mapping     | 4.6                         | 6L     | 6.02 | 125.0                     | 14.7                            | 31                                  |                                                                                                           |
| <i>Knobs 6L2 and 6L3</i> | <i>pl1</i>          | <i>MaizeGDB</i> | <i>n.a.</i>                 | 6L     | 6.04 | 211.5                     | 19.3                            | 52                                  | Not pericentromere, close to the 6L1 knob present in some Latin American races of maize but absent in B73 |
| <i>Knob 7S</i>           | <i>umc2177</i>      | <i>MaizeGDB</i> | <i>n.a.</i>                 | 7S     | 7.00 | 0                         | 0.8                             | 90                                  |                                                                                                           |
| AC148081                 | AY110576            | FPC             | n.a.                        | 7S     | 7.02 | 176.8                     | 4.4                             | 43                                  |                                                                                                           |
| AC148081                 | phi034/cyp6         | IBM mapping     | n.a.                        | 7S     | 7.02 | 179.9                     | 4.8                             | 38                                  | Not pericentromere, not periknob                                                                          |
| Centromere               | Cent7               | MaizeGDB        | n.a.                        | 7      | 7.02 | 209.4                     | 7.8                             | 0                                   |                                                                                                           |
| AC148081                 | umc19383            | IBM mapping     | 18.9                        | 7L     | 7.02 | 244.3                     | 14.2                            | 31                                  |                                                                                                           |
| Knob 7L                  | ij1                 | MaizeGDB        | n.a.                        | 7L     | 7.03 | 330.6                     | 19.8                            | 57                                  |                                                                                                           |

### SI Table 9. Mapping results

Lines in italics correspond to knobs that are present in maize but not in inbred line B73

Abbreviations: n.a.: not analyzed, Chrom.: chromosome, cent.: centromere, cM: centiMorgan, cMC: centiMcClintock
